# Supplementary material
Source: Elsevier journal article supplement (https://www.sciencedirect.com/science/article/pii/S0021755720302060)
Supplement: mmc1 [file S0021755720302060:mmc1.docx]

JPED-D-20-00095 – Supplementary Material

**Supplementary material 1 - Kaplan-Meier survival curves of Pediatric Index of Mortality 2 (PIM2), ferritin, lactate, C-reactive protein (CRP), and their combinations.**

**
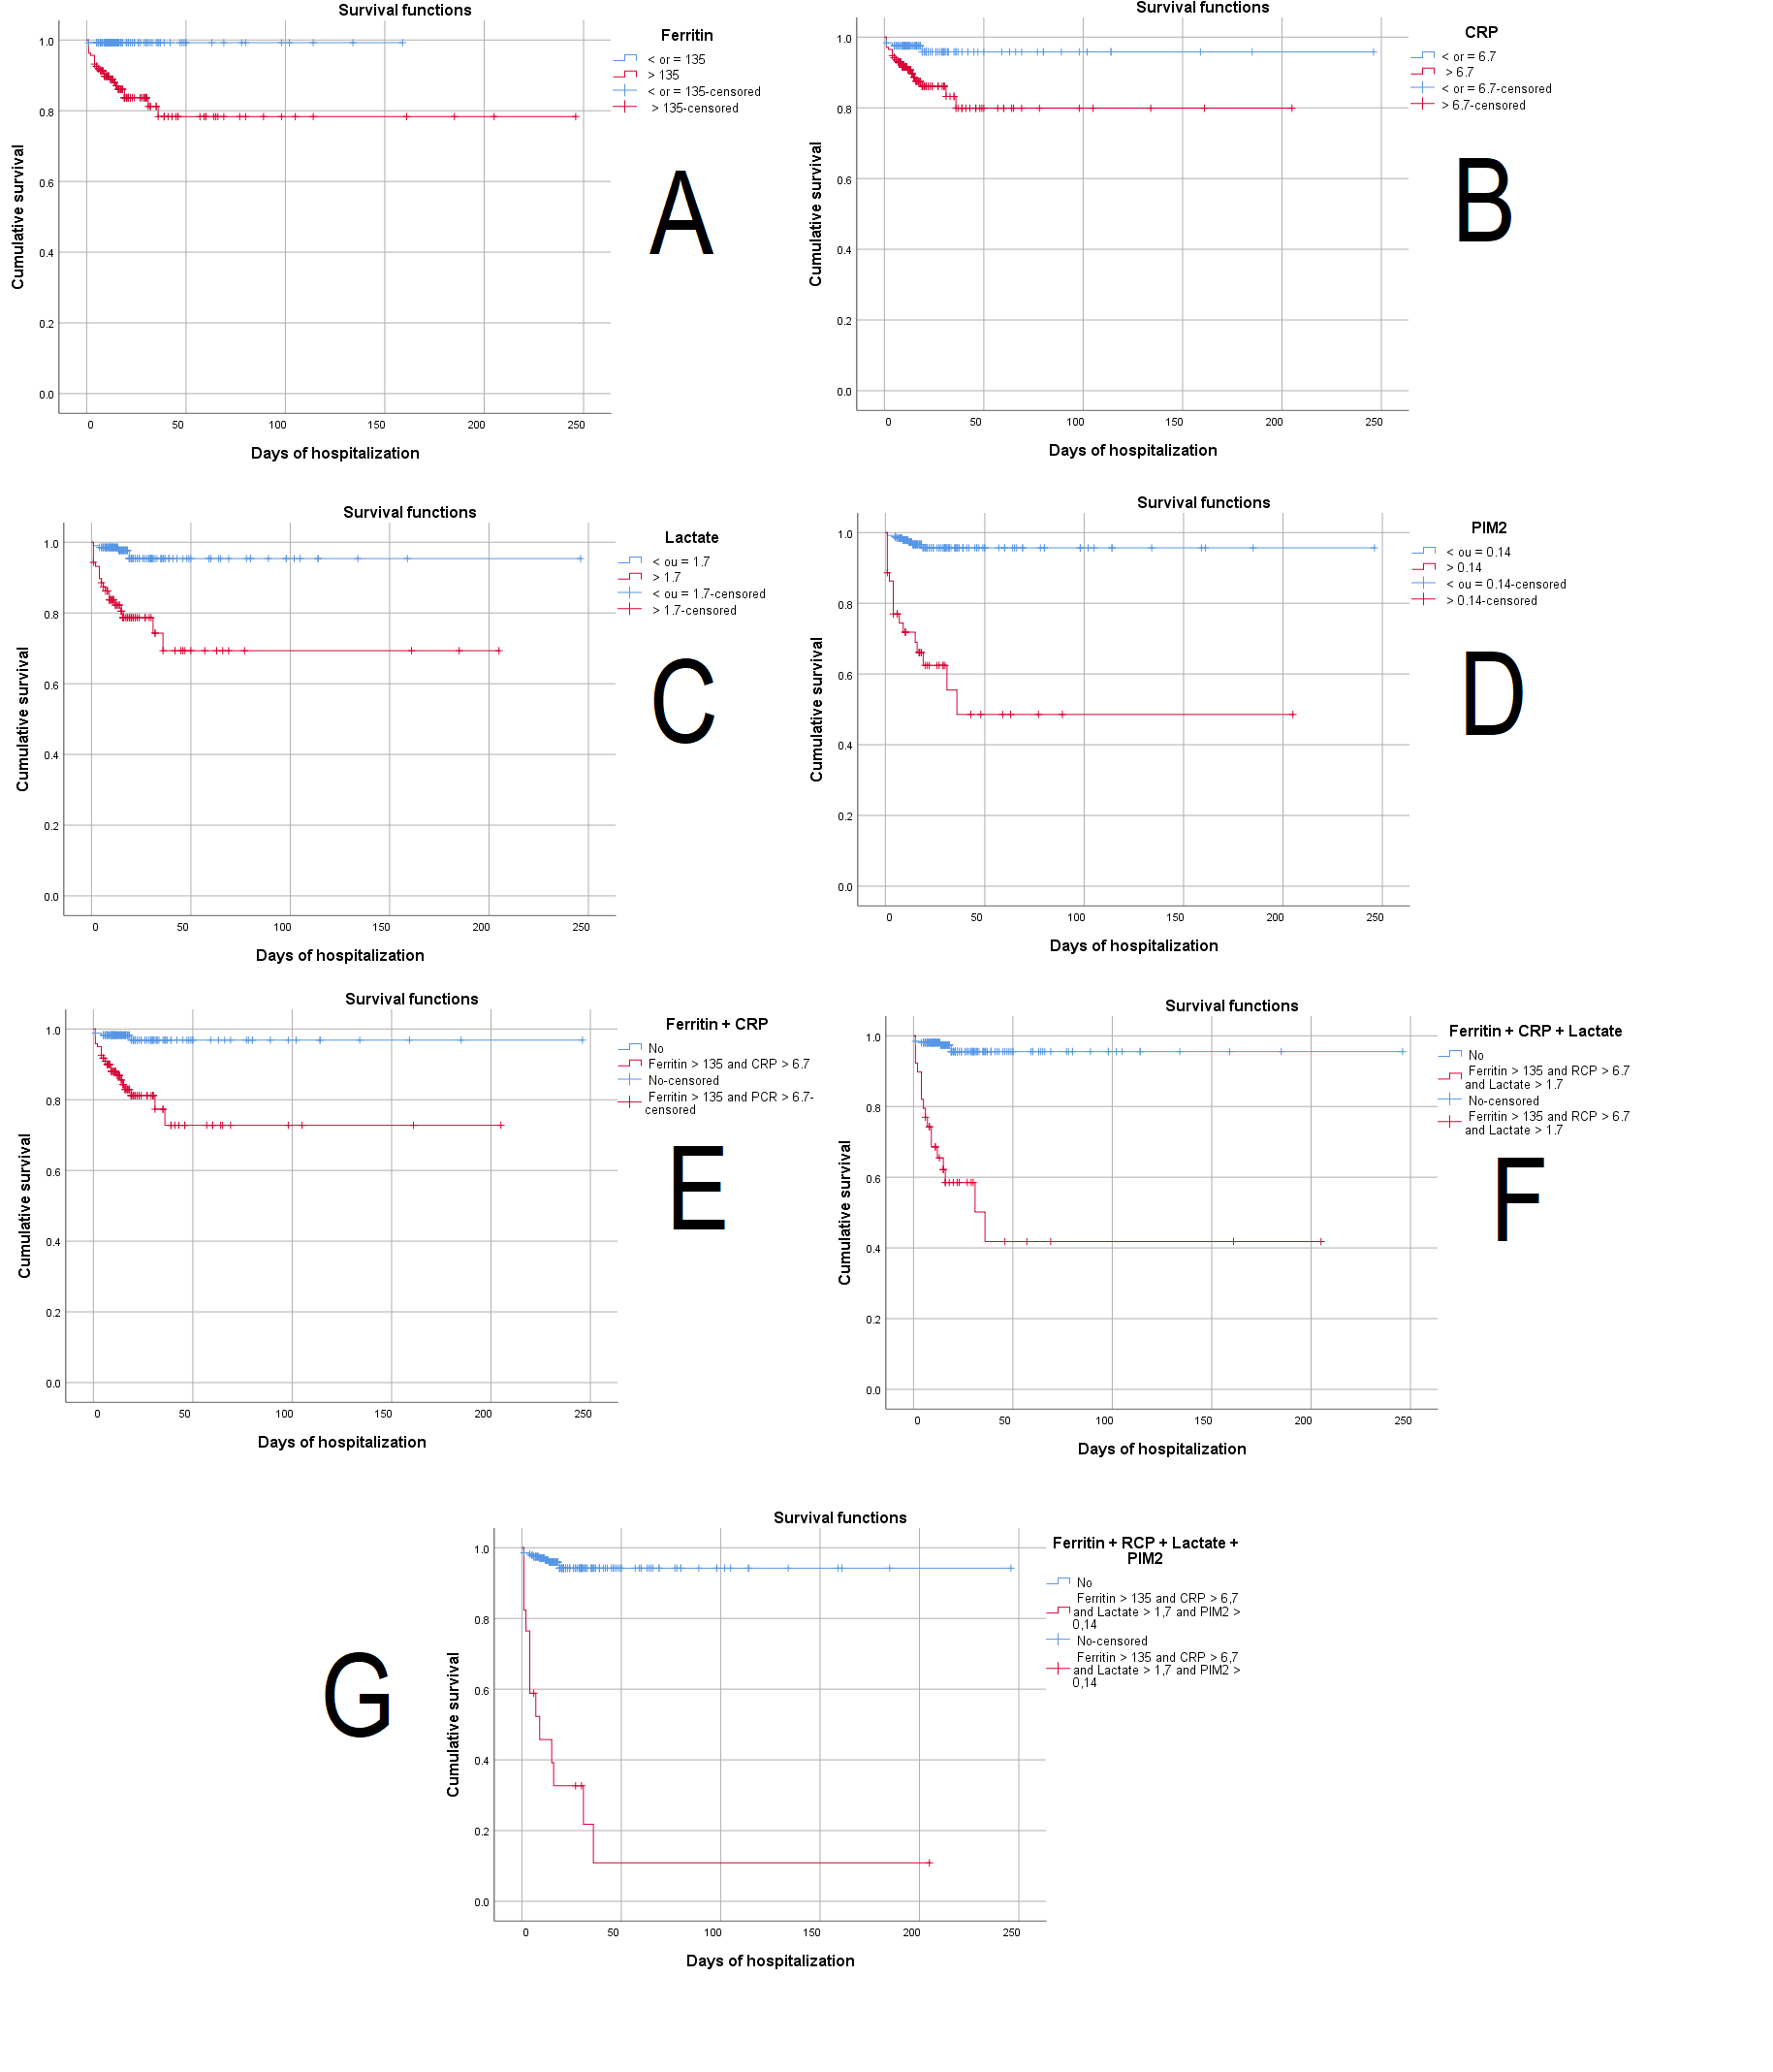
**

A, Ferritin; B, CRP; C, Lactate; D, PIM2; E, Ferritin + CRP; F, Ferritin + CRP + Lactate; G, Ferritin + CRP + Lactate + PIM2.
